# Supplementary material for: A 2D-CFT Factory: Critical Lattice Models from Competing Anyon Condensation in SymTO
Source: Research Square preprint supplement (doi:10.21203/rs.3.rs-7547924/v1), 2025-09-17
Supplement: Supplementary file 1 [file 067ea61f641e7accfc6ff6f1.pdf]

# Supplementary Information

## A 2D-CFT Factory: Critical Lattice Models from Competing Anyon Condensation in SymTO

---

Ling-Yan Hung<sup>1a,c</sup> Kaixin Ji<sup>b</sup> Ce Shen<sup>c</sup> Yidun Wan<sup>2b,d,e</sup> Yu Zhao<sup>b</sup>

<sup>a</sup>Yau Mathematical Sciences Center, Tsinghua University, Beijing 100084, China

<sup>b</sup>State Key Laboratory of Surface Physics, Center for Astronomy and Astrophysics, Department of Physics, Center for Field Theory and Particle Physics, and Institute for Nanoelectronic devices and Quantum Computing, Fudan University, 2005 Songhu Road, Shanghai 200433, China

<sup>c</sup>Beijing Institute of Mathematical Sciences and Applications, Beijing 101408, China

<sup>d</sup>Shanghai Research Center for Quantum Sciences, 99 Xiupu Road, Shanghai 201315, China

<sup>e</sup>Hefei National Laboratory, Hefei 230088, China

E-mail: [lyhung@tsinghua.edu.cn](mailto:lyhung@tsinghua.edu.cn), [kxji21@m.fudan.edu.cn](mailto:kxji21@m.fudan.edu.cn),  
[scbebetterme@gmail.com](mailto:scbebetterme@gmail.com), [ydw@fudan.edu.cn](mailto:ydw@fudan.edu.cn), [yuzhao20@fudan.edu.cn](mailto:yuzhao20@fudan.edu.cn)

---

<sup>1</sup>Corresponding author

<sup>2</sup>Corresponding author

# 1 The HGW String-Net Model

The HGW model [1–3] can be defined on a trivalent lattice, where a tail (purple lines in Fig. 3) is attached to a chosen edge of a plaquette, while the choice is topologically irrelevant. The lattice shape is irrelevant in the string-net model describing topological orders, but it plays an important role in conformal field theories. In this article, for convenience, we only define the HGW model on the truncated square lattice as shown in Figure 3, which facilitates the subsequent renormalization group procedure. The basic configuration is established by labeling each edge and tail with a simple object from the input unitary fusion category  $\mathcal{F}$  of the HGW model, subject to the constraint on all vertices that  $\delta_{ijk} = 1$  for the three incident edges or tails meeting at this vertex. The Hilbert space  $\mathcal{H}$  of the model is spanned by all possible configurations of these labels on the edges and tails. Edges and tails are oriented, but the choice of orientation does not affect the physics.

In the HGW model, anyons reside on the plaquettes of the lattice, and their types are labeled by the simple objects of the Drinfeld center  $\mathcal{Z}(\mathcal{F})$  of the input UFC  $\mathcal{F}$ . A key pro of the HGW construction is that it explicitly manifests the internal gauge degrees of freedom of non-Abelian anyons. Specifically, anyons are realized in the model by *dyons*—a pair consisting of an anyon type  $J$  and its internal gauge degree of freedom  $p$ , where  $p$  is the degree of freedom on the tail of the plaquette where the anyon resides. A given anyon type  $J$ , as a simple object in  $\mathcal{Z}(\mathcal{F})$ , may carry multiple types of internal degree of freedom  $p$ , thereby enlarging its internal gauge space. Although these  $p$  are gauge degrees of freedom and hence unobservable in the topological phase, they play a central role in the construction of the CFT states, where topological invariance is broken to expose these internal degrees of freedom, which become physical local degrees of freedom determine the physical phenomena that may be captured by a critical CFT.

In the HGW model, anyons are created in pairs by acting a *creation operator* on the ground state  $|\Psi\rangle$ . It suffices to define the action of the shortest creation operator  $W_E^{J;pq}$ , which creates a pair of dyons  $(J^*, p^*)$  and  $(J, q)$  in the two adjacent plaquettes separated by an edge  $E$ :

$$W_E^{J;pq} \begin{array}{c} \uparrow \\ j \end{array} := \sum_{k \in L_{\mathcal{F}}} \sqrt{\frac{d_k}{d_j}} \overline{z_{pqj}^{J;k}} \begin{array}{c} \uparrow \\ k \end{array} \begin{array}{c} \uparrow \\ j \end{array} \begin{array}{c} \uparrow \\ j \end{array} \begin{array}{c} \uparrow \\ k \end{array} \begin{array}{c} \uparrow \\ j \end{array} \begin{array}{c} \uparrow \\ q \end{array}, \quad (1.1)$$

where  $J$  is a simple object in  $\mathcal{Z}(\mathcal{F})$ ,  $p, q$  are internal gauge degrees of freedom on tails of anyons,  $j$  is the degree of freedom on edge  $E$ , and  $z_{pqj}^{J;k}$  is the coefficients called *half-braiding tensors*. All other creation operators in the model can be generated by composing such shortest creation operators.

In a companion paper[3], it is shown that the edges of the lattice carry a flat gauge field valued in  $\mathcal{F}$ , and the open ends of the tails host anyon excitations coupled with the gauge field via the Gauss law and gauge connection. This finding allows one to recast topological phases back in the Landau-Ginzburg paradigm, though in a more general sense, where phase transitions are triggered by anyon condensation. The HGW model is a con-

venient framework for constructing any possible kind of anyon condensation in a doubled  
topological phase and study the consequent phenomena[3].

$$\begin{aligned}
\begin{array}{c} \text{A} \\ | \\ \text{A} \text{---} \text{A} \end{array} &= \sum_{abc \in L_{\mathcal{A}}} f_{abc^*} \begin{array}{c} \text{c} \\ | \\ \text{a} \text{---} \text{b} \end{array}, & \begin{array}{c} \text{A} \text{---} \text{A} \\ | \\ \text{A} \end{array} &= \sum_{abc \in L_{\mathcal{A}}} f_{cb^*a^*} \begin{array}{c} \text{a} \text{---} \text{b} \\ | \\ \text{c} \end{array}, \\
& & & (1.2)
\end{aligned}$$

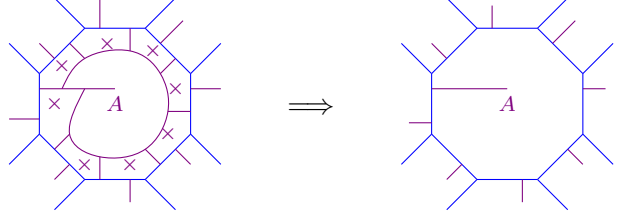

### 1.1 Definitions of Frobenius Algebras and Modules

In this appendix, we quickly review the mathematical definitions of Frobenius algebras and modules. One who wants to construct their own CFTs via our method can take use of the definition of Frobenius algebras and modules in this section.

A unitary Frobenius algebra in  $\mathcal{F}$  is a (possibly composite) objects in  $\mathcal{F}$  i.e.

$$\mathcal{A} = \bigoplus_a n_a a, \quad a \in \mathcal{F}, \quad n_a \in \mathbb{N}, \quad (1.3)$$

equipped with a product  $\mathcal{A} \otimes \mathcal{A} \rightarrow \mathcal{A}$  and coproduct  $\mathcal{A} \rightarrow \mathcal{A} \otimes \mathcal{A}$ , satisfying certain properties. Here,  $n_a$  are non-negative integers describing the multiplicities of object  $a \in \mathcal{F}$  participating in  $\mathcal{A}$ . To avoid clutter, the discussion in this section is limited to  $n_a \leq 1$ , although it can be readily generalized by introducing extra indices  $i$  for each anyon label  $a \in \mathcal{A}$  whose  $n_a > 1$ . For the case where all  $n_a \leq 1$ , the products and co-products of  $\mathcal{A}$  encoded in a cyclically symmetric function  $f^{\mathcal{A}} : L_{\mathcal{A}}^3 \rightarrow \mathbb{C}$ , satisfying

$$\sum_{t \in L_{\mathcal{A}}} f_{rst}^{\mathcal{A}} f_{abt^*}^{\mathcal{A}} G_{abc}^{rst} \sqrt{d_c d_t} = f_{acs}^{\mathcal{A}} f_{rc^*b}^{\mathcal{A}}, \quad (1.4)$$

$$\sum_{ab \in L_{\mathcal{A}}} f_{abc}^{\mathcal{A}} f_{c^*b^*a^*}^{\mathcal{A}} \sqrt{d_a d_b} = d_{\mathcal{A}} \sqrt{d_c}, \quad (1.5)$$

$$f_{abc}^{\mathcal{A}} = f_{bca}^{\mathcal{A}}, \quad f_{1ab}^{\mathcal{A}} = \delta_{ab^*}, \quad f_{abc}^{\mathcal{A}} = (f_{c^*b^*a^*}^{\mathcal{A}})^*. \quad (1.6)$$

where  $L_{\mathcal{A}} = \{a \in \mathcal{F} : n_a = 1\}$  is the set of simple objects appearing in  $\mathcal{A}$ , and  $d_{\mathcal{A}} = \sum_{a \in L_{\mathcal{A}}} d_a$  is the quantum dimension of  $\mathcal{A}$ . One can express this map in basis form, which is depicted in figure 1.

A right module of Frobenius algebra  $\mathcal{A}$  in a UFC  $\mathcal{F}$  is a (possibly composite) object

$$M_{\mathcal{A}} := \bigoplus_{x \in L_{\mathcal{F}}} m_x x,$$

equipped with an algebra action on  $M_{\mathcal{A}}$ :  $M_{\mathcal{A}} \otimes \mathcal{A} \rightarrow M_{\mathcal{A}}$ . Here,  $x$  is a collection of simple objects of  $\mathcal{F}$  that appear in the module, and  $m_x \in \mathbb{N}$  is the multiplicity of  $x$  in  $M$ . For

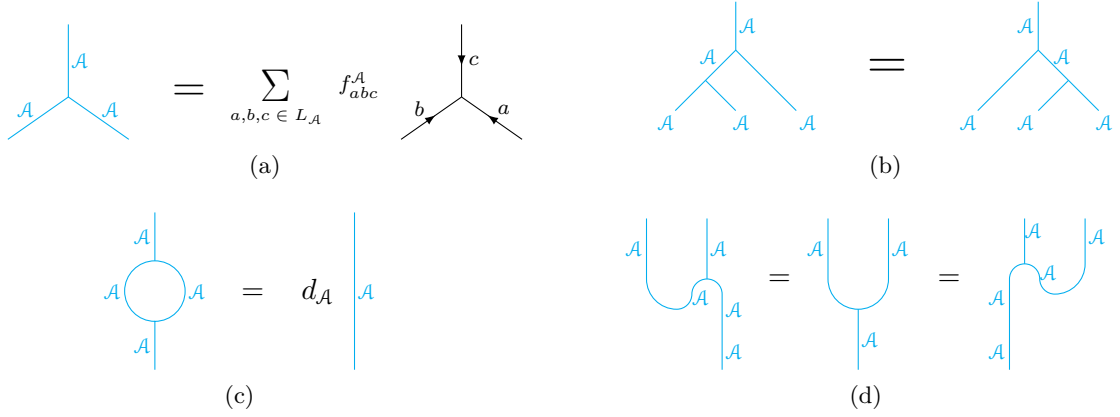

**Figure 1:** (a) Frobenius algebras in basis form. (b) The Associativity: Eq. (1.4). (c) The unitarity: Eq. (1.5). (d) Equations (1.6). Taking different graphical bases yields different equations in Eq. (1.6). This equation is equivalent to the Frobenius condition[4].

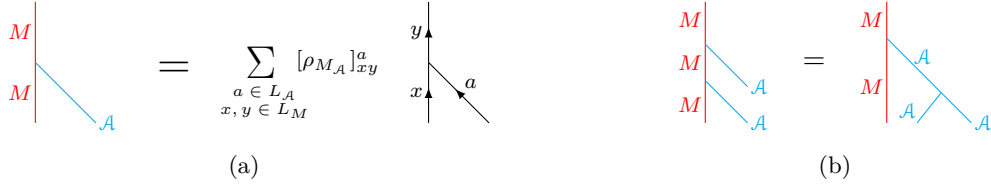

**Figure 2:** (a) The basis representation of right- $\mathcal{A}$  module  $M$ . (b) The right-module condition: Eq. (1.7).

simplicity, in this paper, we restrict to the case  $m_x \leq 1$ , and define  $L_{M_{\mathcal{A}}} = \{x \in L_{\mathcal{F}} \mid m_x = 1\}$ . The algebra action is recorded in a *module function*  $\rho_{M_{\mathcal{A}}} : L_{\mathcal{A}} \otimes L_{M_{\mathcal{A}}}^2 \rightarrow \mathbb{C}$ , which satisfies an associativity constraint:

$$[\rho_{M_{\mathcal{A}}}]_{xy}^a [\rho_{M_{\mathcal{A}}}]_{yz}^b G_{xac}^{bz^*by} = f_{abc}^{\mathcal{A}} [\rho_{M_{\mathcal{A}}}]_{xz}^c, \quad [\rho_{M_{\mathcal{A}}}]_{xy}^a = ([\rho_{M_{\mathcal{A}}}]_{x^*y^*}^{a*})^*. \quad (1.7)$$

In particular, for UFC  $\text{Vec}(G)$  with a finite group  $G$ , the modules over a Frobenius algebra  $\mathcal{A} = \bigoplus_{g \in H} g$  (with multiplication  $f_{fgh}^{\mathcal{A}} = \delta_{e,fgh}$ ) for a subgroup  $H \leq G$  correspond to the representations of  $H$ , and function  $\rho$  encode the representation matrix entries.

One can express the module function in basis form, which is depicted in figure 2: The vertex connecting the edges colored by  $\mathcal{A}$  and the chosen module  $M_{\mathcal{A}}$  are weighted by the coefficients  $[\rho_{M_{\mathcal{A}}}]_{xy}^a$  that defines the action of  $\mathcal{A}$  on the module.

## 1.2 Anyon Condensation in the HGW Model

The HGW model provides a finer description of anyon-condensation-induced topological phase transitions.

To describe the procedure of condensing a Lagrangian set  $L$  of anyons in the HGW

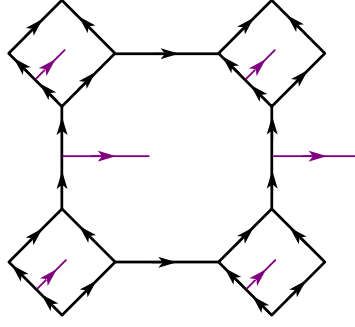

**Figure 3:** The HGW model.

model, we can add to the HGW Hamiltonian a condensation term:

$$H = H_{\mathcal{F}} - \lim_{\Lambda \rightarrow \infty} \sum_E P_E^A,$$

where  $H_{\mathcal{F}}$  is HGW Hamiltonian of the parent topological phase, and  $P_E^A$  is a local projector acting on an edge  $E$ :

$$P_E^A = \sum_{J \in L} \sum_{p,q} \pi_J^{p,q} W_E^{J;pq} = {}_E \mathcal{A} \rangle \langle \mathcal{A} |_E,$$

where  $W_E^{J;pq}$  are creation operators of condensed dyons,  $\pi_J^{p,q} \in \mathbb{C}$  are coefficients to make the sum a projector. In the limit  $\Lambda \rightarrow \infty$ , projectors  $P_E^A$  ensures that the new ground states  $|\mathcal{A}\rangle_E$  are +1 eigenstates of all  $P_E^A$ , which are coherent states filled with arbitrarily many condensed anyons throughout the lattice. This state can be locally represented as:

$$|\mathcal{A}\rangle_E = \begin{array}{c} \text{Diagram with magenta lines and labels } A, j, k, p, q \end{array} = \sum_{j,k,p,q \in L_{\mathcal{A}}} f_{jk^*p^*} f_{kq^*j^*} \begin{array}{c} \text{Diagram with magenta lines and labels } j, k, p, q \end{array},$$

where  $E$  is an edge of the lattice, while the violet lines refer to auxiliary tails in plaquettes, which will then be contracted via topological moves and result in only one tail in each plaquette, representing the entanglements between different edges. The global ground state of the trivial topological order is the state where each edge and tail in the square-octagon lattice carries Frobenius algebra object  $A$ .

In the case of the Doubled Ising model, there are two Frobenius algebras of the input Ising UFC:

$$\mathcal{A}_1 = 1, \quad [f_1]_{111} = 1, \quad \mathcal{A}_2 = 1 \oplus \psi, \quad [f_2]_{111} = [f_2]_{1\psi\psi} = 1.$$

These two input Frobenius algebras are Morita equivalent because they have the same full center  $L = 1\bar{1} \oplus \psi\bar{\psi} \oplus \sigma\bar{\sigma}$ . The corresponding projectors are

$$P_E^{\mathcal{A}_1} = \frac{W_E^{1\bar{1};1,1} + W_E^{\psi\bar{\psi};1,1} + 2W_E^{\sigma\bar{\sigma};1,1}}{4} = \delta_{j_E,0}, \quad P_E^{\mathcal{A}_2} = \frac{W_E^{1\bar{1};1,1} + W_E^{\psi\bar{\psi};1,1} + 2W_E^{\sigma\bar{\sigma};\psi,\psi}}{4}. \quad (1.8)$$

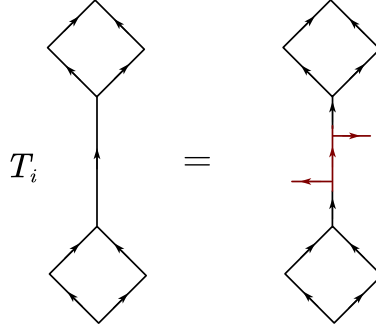

**Figure 4:** Anyon creation operator

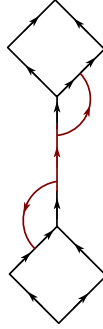

**Figure 5:** Anyon condensation

82 In our square-octagon lattice as shown in the main text, the anyon operator, the pair  
 83 creation operator should act as shown in figure 4. The HGW lattice is different from the  
 84 HGW string net with these extra tails. To make contact with the original version of the  
 85 strange correlator which follows from the HGW ground state wave-function, we would like  
 86 to remove these tails. One very natural way of achieving this is to connect these lines to  
 87 the square, as shown in figure 5, and then removing the extra bubble by F-moves.

88 We note that the Ising critical state

$$\langle \bigvee_{\text{critical}} | = \frac{1}{2} \left( (\sqrt{2} + 1) \langle \bigvee_{\sigma}^1 | + \langle \bigvee_{\sigma}^{\psi} | \right), \quad (1.9)$$

89 is the eigenstate of  $P_E^{A_1} + P_E^{A_2}$  with the largest eigenvalue.

90 This story can be repeated in all pair-competition in which  $\mathcal{A}_i \subset \mathcal{A}_j$  in other fusion  
 91 category. The predicted phase transition between pair-competition is

$$\langle \bigvee_{(\mathcal{A}_i, M_{\mathcal{A}_i}), (\mathcal{A}_j, M_{\mathcal{A}_j})} |_{\text{critical}} = \langle \hat{\mathcal{A}}_i |_{M_{\mathcal{A}_i}} + \langle \hat{\mathcal{A}}_j |_{M_{\mathcal{A}_j}} \quad (1.10)$$

92 One can show that this is always the eigenstate with the largest eigenvalue of the sum  
 93 of projection operators, analogously defined as the Ising case above, irrespective of the  
 94 choice of the common module between  $\mathcal{A}_{i,j}$ .

### 1.3 Lagrangian Algebra of Anyon Condensation

Now, after anyon condensation via a specific projector  $P_E^A$ , the resulting model is a trivial topological phase with a one-dimensional Hilbert space spanned by  $|\mathcal{A}\rangle_E$ . The projector  $P_E^A$  is defined as

$$P_E^A = |\mathcal{A}\rangle_{EE} \langle \mathcal{A}| = \sum_{J \in L} \sum_{p,q} \pi_J^{p,q} W_E^{J;pq}.$$

Solving this equation, the coefficients  $\pi_J^{p,q}$  encapsulate all information about the Lagrangian algebra  $L$  associated with the anyon condensation.

More explicitly, those anyon types  $J$  with  $\pi_J^{pq} \neq 0$  are precisely the condensed anyons appearing in the Lagrangian algebra. It can be proven[3] that all condensed anyons are bosonic and braid trivially with each other.

There may exist multiple dyonic sectors of the same anyon type  $J$  that condense simultaneously; these are called the condensed sectors of  $J$ . The number  $n_{\text{Cond}}^J$  of condensed sectors for anyon  $J$  is referred to as the *multiplicity* of condensed anyon  $J$  during anyon condensation. Collect the condensation coefficients  $\pi_J^{pq}$  for a fixed anyon type  $J$  into a matrix:

$$\Pi^J = \begin{pmatrix} \pi_J^{p_1 p_1} & \pi_J^{p_1 p_2} & \dots \\ \pi_J^{p_2 p_1} & \pi_J^{p_2 p_2} & \dots \\ \vdots & \vdots & \ddots \\ \pi_J^{p_{n_J^p} p_1} & \pi_J^{p_{n_J^p} p_2} & \dots \end{pmatrix}.$$

Then,

$$n_{\text{Cond}}^J = \text{rank}(\Pi^J).$$

The corresponding Lagrangian algebra of the modular tensor category  $\mathcal{Z}(\mathcal{F})$  is thus

$$L = \bigoplus_{J \in L_{\text{Cond}}} n_{\text{Cond}}^J J.$$

We can further diagonalize the condensation matrix using a unitary transformation  $U_J$ :

$$U_J \Pi^J U_J^\dagger = \text{diag}\{\pi_J^1, \pi_J^2, \dots, \pi_J^{n_{\text{Cond}}^J}, 0, 0, \dots, 0\},$$

where  $\pi_J^i \in \mathbb{C}$  and  $1 \leq i \leq n_{\text{Cond}}^J$ . The  $i$ -th condensed sector of anyon  $J$  is then given by

$$|J, i\rangle_{\text{Cond}} = \sum_p \frac{1}{d_p} [U_J]_{ip} |J, p\rangle,$$

and its corresponding creation operator is

$$\tilde{W}_E^{J_i} = \sum_{p,q} \frac{1}{d_p d_q} [U_J^\dagger]_{J_i p} W_E^{J;pq} [U_J]_{q J_i}, \quad (1.11)$$

where the sums run over the  $T$ -charges of anyon  $J$ . The condensation projector  $P_E^A$  can now be written as a sum of these normalized creation operators:

$$P_E^A = \frac{1}{d_A} \sum_{\text{Condensed } J} \sum_{i=1}^{n_{\text{Cond}}^J} \tilde{W}_E^{J_i},$$

which faithfully realize the algebra basis elements of the Lagrangian algebra  $L$ . In particular, the operator product expansion coefficients of these creation operators encode the algebra multiplication structure of  $L$ :

$$W_E^{J_i} W_E^{K_j} = \sum_{M_k} f_{J_i K_j}^{M_k} W_E^{M_k}.$$

## 2 Some Details of Various Categories

### 2.1 The Modular Tensor Category $\mathcal{Z}(S_3)$

We would like to review here some basic data of the  $\mathcal{Z}(S_3)$  category. The symmetry group  $S_3 = \langle x, y | x^3 = y^2 = e, yx = x^2 y \rangle$ . The anyons of  $\mathcal{Z}(S_3)$  are labeled by a pair  $(W, \gamma_W)$ , where  $W$  is a conjugacy class of the group  $S_3$ , and  $\gamma_W$  an irreducible representation of the centralizer of  $W$ . There're eight kinds of anyons in  $\mathcal{Z}(S_3)$ , conventionally labelled by letters  $A$  through  $H$ . A summary of all the anyons are listed below.

|                                                   | $A$      | $B$  | $C$   | $D$                | $E$       | $F$            | $G$            | $H$             |
|---------------------------------------------------|----------|------|-------|--------------------|-----------|----------------|----------------|-----------------|
| conjugacy class $W$                               | $\{e\}$  |      |       | $\{y, xy, x^2 y\}$ |           | $\{x, x^2\}$   |                |                 |
| centralizer $\cong$                               | $S_3$    |      |       | $\mathbb{Z}_2$     |           | $\mathbb{Z}_3$ |                |                 |
| irrep $\gamma_W$ of centralizer                   | <b>1</b> | sign | $\pi$ | <b>1</b>           | <b>-1</b> | <b>1</b>       | $\omega$       | $\omega^*$      |
| $\dim(\gamma_W)$                                  | 1        | 1    | 2     | 1                  | 1         | 1              | 1              | 1               |
| quantum dimension $d =  W  \times \dim(\gamma_W)$ | 1        | 1    | 2     | 3                  | 3         | 2              | 2              | 2               |
| twist $\theta$                                    | 1        | 1    | 1     | 1                  | -1        | 1              | $e^{2\pi i/3}$ | $e^{-2\pi i/3}$ |

Their fusion rules are given by

| $\otimes$ | $A$ | $B$ | $C$                   | $D$                                     | $E$                                     | $F$                   | $G$                   | $H$                   |
|-----------|-----|-----|-----------------------|-----------------------------------------|-----------------------------------------|-----------------------|-----------------------|-----------------------|
| $A$       | $A$ | $B$ | $C$                   | $D$                                     | $E$                                     | $F$                   | $G$                   | $H$                   |
| $B$       | $B$ | $A$ | $C$                   | $E$                                     | $D$                                     | $F$                   | $G$                   | $H$                   |
| $C$       | $C$ | $C$ | $A \oplus B \oplus C$ | $D \oplus E$                            | $D \oplus E$                            | $G \oplus H$          | $F \oplus H$          | $F \oplus G$          |
| $D$       | $D$ | $E$ | $D \oplus E$          | $A \oplus C \oplus F \oplus G \oplus H$ | $B \oplus C \oplus F \oplus G \oplus H$ | $D \oplus E$          | $D \oplus E$          | $D \oplus E$          |
| $E$       | $E$ | $D$ | $D \oplus E$          | $B \oplus C \oplus F \oplus G \oplus H$ | $A \oplus C \oplus F \oplus G \oplus H$ | $D \oplus E$          | $D \oplus E$          | $D \oplus E$          |
| $F$       | $F$ | $F$ | $G \oplus H$          | $D \oplus E$                            | $D \oplus E$                            | $A \oplus B \oplus F$ | $C \oplus H$          | $C \oplus G$          |
| $G$       | $G$ | $G$ | $F \oplus H$          | $D \oplus E$                            | $D \oplus E$                            | $C \oplus H$          | $A \oplus B \oplus G$ | $C \oplus F$          |
| $H$       | $H$ | $H$ | $F \oplus G$          | $D \oplus E$                            | $D \oplus E$                            | $C \oplus G$          | $C \oplus F$          | $A \oplus B \oplus H$ |

There're 4 distinct Lagrangian algebras in  $\mathcal{Z}(S_3)$ , labeled by the 4 different subgroups of  $S_3$ . The Lagrangian algebras corresponding to each subgroup are listed in the following table.



| subgroup $K$   | Lagrangian algebra $L$ |
|----------------|------------------------|
| $\mathbb{1}$   | $A \oplus B \oplus 2C$ |
| $\mathbb{Z}_2$ | $A \oplus C \oplus D$  |
| $\mathbb{Z}_3$ | $A \oplus B \oplus 2F$ |
| $S_3$          | $A \oplus D \oplus F$  |

131

## 132 2.2 Haagerup Fusion Category $H_3$

The *Haagerup* fusion category is a notably special category. It contains six types of simple objects, labeled by

$$1, \quad \alpha, \quad \alpha^2, \quad \rho, \quad \alpha\rho, \quad \alpha^2\rho,$$

with the following quantum dimensions

$$d_1 = d_\alpha = d_{\alpha^2} = 1, \quad d_\rho = d_{\alpha\rho} = d_{\alpha^2\rho} = \frac{3 + \sqrt{13}}{2}.$$

133 The fusion rules are

|                |                |                |                                                              |                                                              |                                                              |
|----------------|----------------|----------------|--------------------------------------------------------------|--------------------------------------------------------------|--------------------------------------------------------------|
| 1              | $\alpha$       | $\alpha^2$     | $\rho$                                                       | $\alpha\rho$                                                 | $\alpha^2\rho$                                               |
| $\alpha$       | $\alpha^2$     | 1              | $\alpha\rho$                                                 | $\alpha^2\rho$                                               | $\rho$                                                       |
| $\alpha^2$     | 1              | $\alpha$       | $\alpha^2\rho$                                               | $\rho$                                                       | $\alpha\rho$                                                 |
| $\rho$         | $\alpha^2\rho$ | $\alpha\rho$   | $1 \oplus \rho \oplus \alpha\rho \oplus \alpha^2\rho$        | $\alpha^2 \oplus \rho \oplus \alpha\rho \oplus \alpha^2\rho$ | $\alpha \oplus \rho \oplus \alpha\rho \oplus \alpha^2\rho$   |
| $\alpha\rho$   | $\rho$         | $\alpha^2\rho$ | $\alpha \oplus \rho \oplus \alpha\rho \oplus \alpha^2\rho$   | $1 \oplus \rho \oplus \alpha\rho \oplus \alpha^2\rho$        | $\alpha^2 \oplus \rho \oplus \alpha\rho \oplus \alpha^2\rho$ |
| $\alpha^2\rho$ | $\alpha\rho$   | $\rho$         | $\alpha^2 \oplus \rho \oplus \alpha\rho \oplus \alpha^2\rho$ | $\alpha \oplus \rho \oplus \alpha\rho \oplus \alpha^2\rho$   | $1 \oplus \rho \oplus \alpha\rho \oplus \alpha^2\rho$        |

134

### 135 2.2.1 Frobenius Algebras and Modules

136 The Haagerup category has seven Frobenius algebras divided into three Morita classes.

137 The Haagerup fusion rules are not commutative, so the left and right modules are slightly  
138 different. We only consider the right modules here. The module function tensor component  
139  $[\rho_M^A]_{xy}^a$  represents the algebra object  $a \in \mathcal{A}$  fuses from right to module object  $x \in M$  and  
140 transform it to  $y \in M$ , i.e.,  $y \in x \otimes a$ . The three minimal algebras along with their modules  
141 are listed below:

142 1. The trivial Frobenius algebra  $\mathcal{A}_0 = \mathbf{1}$ , such that  $f_1^{\mathbf{1}\mathbf{1}} = 1$ . It has six *right* modules:  
143  $M_x = x, \rho_{xx}^{\mathbf{1}} = \mathbf{1}$ , where  $x$  is a Haagerup simple object.

2. The  $\mathbb{Z}_3$  Frobenius algebra  $\mathcal{A}_2 = \mathbf{1} \oplus \alpha \oplus \alpha^2$ , such that  $f_a^{bc} = N_a^{bc}$ , the fusion rules. It has two simple modules:

$$M_{\mathbf{1}} = \mathbf{1} \oplus \alpha \oplus \alpha^2, \quad [\rho_{\mathbf{1}}]_{xy}^a = N_y^{xa},$$

$$M_\rho = \rho \oplus \alpha\rho \oplus \alpha^2\rho, \quad [\rho_\rho]_{xy}^a = N_y^{xa}(-1)^{\delta_{a,\alpha^2}\delta_{x,\alpha\rho}\delta_{y,\alpha^2\rho}},$$

3. The special Frobenius algebra  $\mathcal{A}_4 = \mathbf{1} \oplus \rho \oplus \alpha\rho$ . The algebra multiplication  $f_a^{bc}$  is too cumbersome to write here. It has four simple right modules:

$$\begin{aligned}
M_{\mathbf{1}} &= \mathbf{1} \oplus \rho \oplus \alpha\rho, & [\rho_{\mathbf{1}}]_{xy}^a &= f_y^{xa}. \\
M_{\alpha} &= \alpha \otimes M_{\mathbf{1}} = \alpha \oplus \alpha\rho \oplus \alpha^2\rho, & [\rho_{\alpha}]_{xy}^a &= \frac{f_y^{xa}}{[F_y^{\alpha, \alpha^2 \otimes x, a}]_{x, \alpha^2 \otimes y}}. \\
M_{\alpha^2} &= \alpha^2 \otimes M_{\mathbf{1}} = \alpha^2 \oplus \rho \oplus \alpha^2\rho, & [\rho_{\alpha^2}]_{xy}^a &= \frac{f_y^{xa}}{[F_y^{\alpha^2, \alpha \otimes x, a}]_{x, \alpha \otimes y}}, \\
M_{\rho} &= \rho \oplus \alpha^2\rho \oplus \alpha\rho.
\end{aligned}$$

144 The module function of  $M_{\rho}$  is somewhat messy and will not be presented in the text.

145 The other connected Frobenius algebras can be obtained by conjugating these minimal  
146 algebras with some simple objects. The modules of the other non-minimal Frobenius  
147 algebras can be easily calculated from those of the minimal ones. We take  $\mathcal{A}_5 = \alpha \otimes \mathcal{A}_4 \alpha^2$   
148 as an illustrating example. For  $M_i$  any right- $\mathcal{A}_4$  module,  $M_i \otimes \alpha^2$  must be a right- $\mathcal{A}_5$   
149 module. And the module function of  $M_i \otimes \alpha^2$  (on  $\mathcal{A}_5$ ) differ from  $M_i$  (on  $\mathcal{A}_4$ ) only by some  
150 F-symbols, which can be determined immediately. We summarize all the algebras, their  
151 right-modules and the refined condensation tree below.

| $\mathcal{A}$                                                                | Right- $\mathcal{A}$ modules                                                                                                                                                                                   |
|------------------------------------------------------------------------------|----------------------------------------------------------------------------------------------------------------------------------------------------------------------------------------------------------------|
| $\mathbf{1}$                                                                 | Every simple object is an independent module                                                                                                                                                                   |
| $\rho \otimes \rho$                                                          | $i \otimes \rho$ where $i$ is any simple object                                                                                                                                                                |
| $\mathbf{1} \oplus \alpha \oplus \alpha^2$                                   | $\mathbf{1} \oplus \alpha \oplus \alpha^2, \rho \otimes (\mathbf{1} \oplus \alpha \oplus \alpha^2)$                                                                                                            |
| $\rho \otimes (\mathbf{1} \oplus \alpha \oplus \alpha^2) \otimes \rho$       | $(\mathbf{1} \oplus \alpha \oplus \alpha^2) \otimes \rho, \rho \otimes (\mathbf{1} \oplus \alpha \oplus \alpha^2) \otimes \rho$                                                                                |
| $\mathbf{1} \oplus \rho \oplus \alpha\rho$                                   | $\mathbf{1} \oplus \rho \oplus \alpha\rho, \alpha \otimes (\mathbf{1} \oplus \rho \oplus \alpha\rho), \alpha^2 \otimes (\mathbf{1} \oplus \rho \oplus \alpha\rho), \rho \oplus \alpha\rho \oplus \alpha^2\rho$ |
| $\alpha \otimes (\mathbf{1} \oplus \rho \oplus \alpha\rho) \otimes \alpha^2$ | $M \otimes \alpha^2$ where $M$ is any right module of $\mathbf{1} \oplus \rho \oplus \alpha\rho$                                                                                                               |
| $\alpha^2 \otimes (\mathbf{1} \oplus \rho \oplus \alpha\rho) \otimes \alpha$ | $M \otimes \alpha$ where $M$ is any right module of $\mathbf{1} \oplus \rho \oplus \alpha\rho$                                                                                                                 |

### 154 3 Critical Strange Correlator of the Ising Category

155 As an example, we explicitly write down the local transfer matrix for competing Ising  
156 anyons. The predicted critical unit cell (1.9) reads

$$M_{\sigma\sigma\sigma\sigma 1} = (\sqrt{2} + 1)/2, M_{\sigma\sigma\sigma\sigma\psi} = 1/2,$$

157 which give rise to the local transfer matrix for a unit cell

$$z_{b_1 b_2 b_3 b_4 e, i_1 i_2 k_1 k_2} = \sqrt[4]{d_e^2 d_{b_1} d_{b_2} d_{b_3} d_{b_4} d_{i_1} d_{i_2} d_{k_1} d_{k_2}} M_{b_1 b_2 b_3 b_4 e} \begin{bmatrix} b_1 & e & b_2 \\ i_2 & k_1 & i_1 \end{bmatrix} \begin{bmatrix} b_3 & e & b_4 \\ i_2 & k_2 & i_1 \end{bmatrix} \quad (3.1)$$

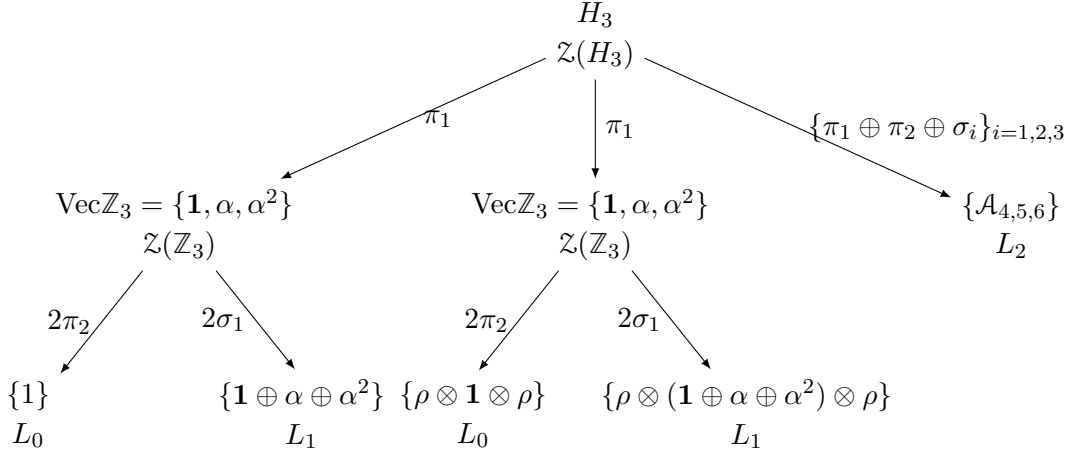

**Figure 6:** Condensation tree for the doubled  $H_3$  symTO. The right most branch abbreviates the 3 Morita equivalent branches, with the Frobenius algebras involved given above.

158 We omit  $b_1 = b_2 = b_3 = b_4 = \sigma$  and sum over the inner index  $e$  to

$$z_{\sigma\sigma 11} = \sqrt{2} + 1, z_{\sigma\sigma\psi\psi} = \sqrt{2} + 1, z_{\sigma\sigma 1\psi} = 1, z_{\sigma\sigma\psi 1} = 1, \quad (3.2a)$$

$$z_{11\sigma\sigma} = \sqrt{2} + 1, z_{\psi\psi\sigma\sigma} = \sqrt{2} + 1, z_{1\psi\sigma\sigma} = 1, z_{\psi 1\sigma\sigma} = 1. \quad (3.2b)$$

159 If we interpret 1 and  $\psi$  as spin up and down, each line in (3.2) gives one independent  
 160 copy of the local weights  $e^{2\beta} = \sqrt{2} + 1$  for a classical Ising model with the critical inverse  
 161 temperature  $\beta = \frac{1}{2}\ln(\sqrt{2} + 1)$ . The object  $\sigma$  acts as a placeholder to keep these two copies  
 162 disentangled.

163 We thus conclude that the strange correlator with the critical unit cell (1.9) is a  
 164 partition function of two copies of critical Ising.

#### 165 4 The Effect of the Collection of Objects $M_{\mathcal{A}_i} \neq M_{\mathcal{A}_j}$ in the interpolation 166 in a unit cell

167 We emphasized in the main text that to deconstruct the competition of condensates in the  
 168 global lattice into competitions within the unit cells, it is crucial to color the slanted edges  
 169 in the unit cell by module  $M_{\mathcal{A}_{i,j}}$  such that these modules contain exactly the same set of  
 170 objects, even though generically module functions could differ.

171 Here, we illustrate with examples that when  $M_{\mathcal{A}_i}$  and  $M_{\mathcal{A}_j}$  contain different objects,  
 172 condensates in neighbouring unit cells would be entangled non-trivially. The equilibrium  
 173 constructed within one unit cell in (1.10) would be disrupted by its neighbors.

174 As an illustration, let us consider the Ising model. We again consider the competition  
 175 between  $\mathcal{A}_1 = \mathbf{1}$  and  $\mathcal{A}_2 = \mathbf{1} \oplus \psi$  with however the following interpolation

$$\left\langle \bigvee_{(\mathcal{A}_1, \sigma), (\mathcal{A}_2, \mathbf{1} \oplus \psi)} \right\rangle = \langle \hat{\mathcal{A}}_1 |_{\sigma} + r \langle \hat{\mathcal{A}}_2 |_{\mathbf{1} \oplus \psi}, \quad (4.1)$$

176 where we have chosen  $M_{\mathcal{A}_1} = \sigma$  and  $M_{\mathcal{A}_2} = \mathbf{1} \oplus \psi$ . Now consider assembling the global  $|\Omega\rangle$   
 177 from this unit cell, as indicated in the Figure 1 of the main text. It is clear that for two

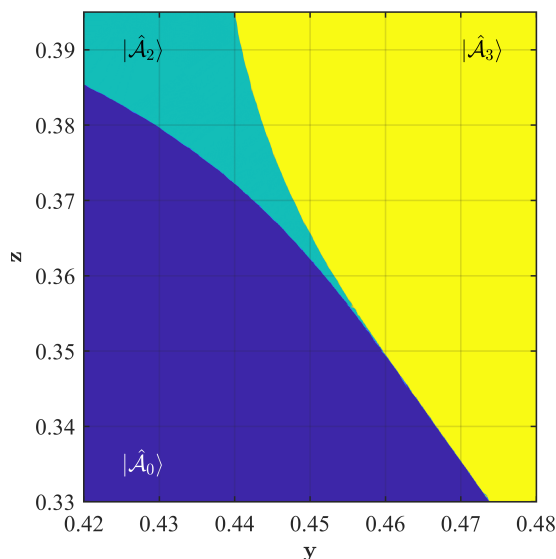

**Figure 7:** Close-up view of the  $\mathcal{A}_5$  phase diagram near the tri-critical point, colored according to the converged tensor.

neighbouring unit cells connected by a slanted edge in which the module runs, when  $\mathcal{A}_1$  appears in one unit cell, all of its neighbours must also be  $\mathcal{A}_1$ , and as a result all unit cells are forced into  $\mathcal{A}_1$ . Similarly when  $\mathcal{A}_2$  appears in one unit cell, all unit cells in the global state are simultaneously  $\mathcal{A}_2$ . Each of these corresponds to a global RG fixed point state of a globally condensed phase.

There is thus complete correlation between all unit cells, and the equilibrium intended for a single unit cell in equation (1.10) did not correspond to the phase transition point as  $r$  is varied. Instead, it is found that the critical coupling occurs at  $r_c = 2^{1/4} = \sqrt{\frac{d_{M_{\mathcal{A}_2}}}{d_{M_{\mathcal{A}_1}}}}$ .

One can readily check that this is equivalent to the equal weight summation of the  $\mathcal{A}_1$  and  $\mathcal{A}_2$  condensate, with normalisation defined by the *global lattice* instead of the unit cell. Also, given that the entire global lattice now plays the role of the unit cell, the dimension of phase space is huge and not surprisingly the phase transition point is first order.

When the module objects are common between  $M_{\mathcal{A}_i}$  and  $M_{\mathcal{A}_j}$ , one can readily show that every module object in one unit cell to be fed to the next neighbouring cell would be acted upon by every member of the condensate in the linear combination of condensates in the next cell. Therefore each unit cell forms a common background to all the condensates appearing in its neighbour cell. As a result equilibrium achieved in a unit cell is not disrupted by its neighbour. The unit cells are essentially factorised as desired.

## 5 Locating the tri-critical point in the $\mathcal{A}_5$ phase diagram

In the  $\mathcal{A}_5$  phase diagram, there appears to be a discrepancy between the analytically predicted and numerically observed locations of the tri-critical point. We now resolve this

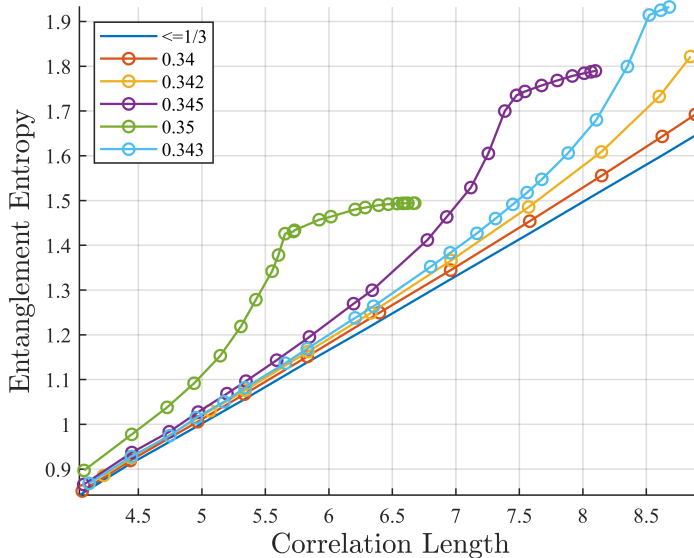

**Figure 8:** Entanglement scaling for different values of  $z$  along the KW dual line of the  $\mathcal{A}_5$  phase diagram.

199 issue.

200 Analytically, the partition function along the KW duality line can be mapped to the  
 201 duality line of the well-known Ashkin–Teller (AT) model. The  $c = 1$  critical segment of  
 202 the AT model corresponds to the KW dual line in our model for  $0 \leq z \leq \frac{1}{3}$ , with  $z = \frac{1}{3}$   
 203 marking the tri-critical point [5]. Beyond this point, the critical line bifurcates into two  
 204 distinct Ising-critical branches.

205 A magnified phase diagram is shown in Figure 7. The separation of the two Ising  
 206 critical lines becomes visible around  $z \approx 0.35$ , below which they appear to merge into a  
 207 single critical line. For  $z \leq 0.35$ , we switch to the entanglement scaling method [6], which,  
 208 although computationally too expensive to map the entire diagram, provides more reliable  
 209 identification of critical points than our TNR algorithm at hand.

210 In Figure 8, we plot the entanglement entropy versus correlation length along the KW  
 211 duality line  $z = -\sqrt{2}y + 1$ . For  $z \leq \frac{1}{3}$ , all data fall on the same  $c = 1$  line. For larger  $z$ ,  
 212 however, the plots exhibit varying slopes. At small bond dimension (the lower part of each  
 213 plot, corresponding to less coarse-grained system sizes), the data initially suggest a CFT  
 214 with effective central charge  $c > 1$ . As the bond dimension increases, the scaling crosses  
 215 over to a line with central charge  $c \approx 0.5$  before eventually saturating, indicating a gapped  
 216 phase. Slightly above  $z = \frac{1}{3}$ , such as at  $z = 0.342$ , the data form an almost straight line  
 217 with apparent  $c > 1$ . We believe for sufficiently large bond dimensions a crossover to the  
 218  $c = 0.5$  line would appear, followed by saturation. Nevertheless, these observations indicate  
 219 that parts of the seemingly  $c \approx 1$  region actually arise from two closely spaced Ising CFT  
 220 lines. In our parametrization, VUMPS calculations confirm that the distance between the  
 221 two branches is approximately  $3 \times 10^{-5}$  at  $z = 0.35$ , consistent with the barely discernible

<sup>222</sup> separation observed in the phase diagram (Fig. 7).

223 **References**

- 224 [1] Y. Hu, N. Geer, and Y.-S. Wu, “Full dyon excitation spectrum in extended levin-wen models,”  
225 *Physical Review B* **97** no. 19, (2018) 195154.
- 226 [2] Y. Zhao and Y. Wan, “Noninvertible gauge symmetry in  $(2+1)$  d topological orders: A  
227 string-net model realization,” *arXiv preprint arXiv:2408.02664* (2024) .
- 228 [3] Y. Zhao and Y. Wan, “Nonabelian anyon condensation in 2+1d topological orders: A  
229 string-net model realization,” *JHEP* **05** (2025) 156, [arXiv:2409.05852 \[cond-mat.str-el\]](#).
- 230 [4] Y. Hu, Z.-X. Luo, R. Pankovich, Y. Wan, and Y.-S. Wu, “Boundary hamiltonian theory for  
231 gapped topological phases on an open surface,” *Journal of High Energy Physics* **2018** no. 1,  
232 (2018) 1–41.
- 233 [5] Y. Aoun, M. Dober, and A. Glazman, “Phase Diagram of the Ashkin–Teller Model,”  
234 *Commun. Math. Phys.* **405** no. 2, (2024) 37.
- 235 [6] L. Vanderstraeten, J. Haegeman, and F. Verstraete, “Tangent-space methods for uniform  
236 matrix product states,” *SciPost Phys. Lect. Notes* **7** (2019) 1, [arXiv:1810.07006](#).
